# Supplementary material for: Multi-Omics, an Integrated Approach to Identify Novel Blood Biomarkers of Alzheimer’s Disease
Source: MDPI journal article supplement (doi:10.3390/metabo12100949), 2022-10-06
Supplement: s1 [file s1]

## Supplementary Material

**Table S1.** Top proteins different between cognitively normal, MCI and AD based on p-values. Abundance Data have been log transformed/normalised.

| MCI protein biomarkers                                     |          |                   |               |                     |
|------------------------------------------------------------|----------|-------------------|---------------|---------------------|
| Protein                                                    | Prot ID  | Control Mean (SD) | MCI Mean (SD) | P-value (ad-justed) |
| Mannan binding lectin serine protease 1                    | P48740.3 | 11.7 (0.359)      | 11 (0.433)    | 0.0007165           |
| Hemoglobin subunit epsilon                                 | P02100.2 | 13.6 (1.08)       | 14.7 (0.87)   | 0.001293            |
| Complement C4 A                                            | P0C0L4.2 | 18.2 (0.192)      | 18 (0.22)     | 0.001694            |
| EGF containing fibulin like extracellular matrix protein 1 | Q12805.2 | 12.8 (0.228)      | 13.6 (0.344)  | 0.002273            |
| Hemoglobin subunit delta                                   | P02042.2 | 14.1 (1.01)       | 15.1 (0.869)  | 0.00268             |
| Selenoprotein P                                            | P49908.3 | 11.7 (0.595)      | 12.2 (0.308)  | 0.004073            |
| Inter alpha trypsin inhibitor heavy chain H1               | P19827.3 | 16.5 (0.154)      | 16.7 (0.0869) | 0.004114            |
| Hemoglobin subunit beta                                    | P68871.2 | 15.5 (0.834)      | 16.2 (0.775)  | 0.006025            |
| Galectin 3 binding protein                                 | Q08380.1 | 11.8 (0.358)      | 11.9 (0.36)   | 0.007708            |
| AD protein biomarkers                                      |          |                   |               |                     |
| Protein                                                    | Prot ID  | Control Mean (SD) | AD Mean (SD)  | P-value (ad-justed) |
| Extracellular matrix protein 1                             | Q16610.2 | 12.5 (0.242)      | 12.1 (0.237)  | 0.0009973           |
| Selenoprotein P                                            | P49908.3 | 11.7 (0.595)      | 12.3 (0.33)   | 0.001125            |
| Complement C4 A                                            | P0C0L4.2 | 18.2 (0.192)      | 18 (0.22)     | 0.001694            |
| Tetranectin                                                | P05452.3 | 13.4 (0.171)      | 13.2 (0.195)  | 0.001627            |
| Fibronectin                                                | P02751.4 | 16.1 (0.334)      | 15.6 (0.208)  | 0.002327            |
| Pregnancy zone protein                                     | P20742.4 | 12.7 (0.273)      | 12.9 (0.209)  | 0.003691            |
| Coagulation factor X                                       | P00742.2 | 9.65 (0.274)      | 9.34 (0.243)  | 0.004271            |
| Apolipoprotein A                                           | P02647.1 | 14.4 (0.565)      | 14 (0.517)    | 0.005309            |
| Von Willebrand factor A domain containing protein 5B2      | Q8N398.2 | 12.7 (0.458)      | 12.3 (0.622)  | 0.005337            |

**Table S2.** Top metabolites different between cognitively normal, MCI and AD based on p-values.  
<sup>(1), (2)</sup>Mass-spec unable to discriminate between these paired metabolites due to their similar molecular structures.

| MCI metabolite biomarkers                           |                   |               |                     |
|-----------------------------------------------------|-------------------|---------------|---------------------|
| Metabolite                                          | Control Mean (SD) | MCI Mean (SD) | P-value (ad-justed) |
| N-Acetyl-alpha-D-glucosamine-1-phosphate            | 7.09 (0.594)      | 6.54 (0.841)  | 0.005431            |
| L-Glutamine                                         | 9.17 (0.354)      | 8.86 (0.504)  | 0.006559            |
| L-Norleucine                                        | 3.4 (0.257)       | 3.53 (0.253)  | 0.01747             |
| N-Methylalanine                                     | 1.16 (0.376)      | 1.37 (0.28)   | 0.01991             |
| 3-Hydroxyisovaleric acid                            | 1.46 (0.625)      | 1.02 (0.38)   | 0.02198             |
| Isopentyl acetate <sup>(1)</sup>                    | 9.84 (0.146)      | 9.7 (0.209)   | 0.0226              |
| Itaconic acid <sup>(1)</sup>                        | 9.84 (0.146)      | 9.7 (0.209)   | 0.0226              |
| Myo-Inositol                                        | 15.4 (0.147)      | 15.5 (0.181)  | 0.02325             |
| L-Fucose                                            | 0.623 (1.4)       | 0.13 (1.35)   | 0.02387             |
| AD metabolite biomarkers                            |                   |               |                     |
| Metabolite                                          | Control Mean (SD) | AD Mean (SD)  | P-value (ad-justed) |
| L-Glutamic acid                                     | 9.98 (0.412)      | 9.57 (0.459)  | 0.003189            |
| Hypoxanthine                                        | 9.35 (0.449)      | 8.73 (0.792)  | 0.003828            |
| Epinephrine <sup>(2)</sup>                          | -2.08 (0.805)     | -2.62 (0.714) | 0.006018            |
| 3-4-Dihydroxyphenylglycol <sup>(2)</sup>            | -2.08 (0.805)     | -2.62 (0.714) | 0.006018            |
| D-Sedoheptulose-7-phosphate                         | 5.48 (0.616)      | 4.95 (0.789)  | 0.006293            |
| Pelargonic acid                                     | -1.78 (0.24)      | -1.67 (0.158) | 0.00772             |
| Uridine                                             | 9.61 (0.256)      | 9.35 (0.379)  | 0.009483            |
| N-Acetyl-alpha-D-glucosamine-1-phosphate            | 7.09 (0.594)      | 6.69 (0.577)  | 0.01272             |
| 12a-Hydroxy-9-Demethylmunduserone-8-Carboxylic Acid | 0.431 (0.241)     | 0.303 (0.252) | 0.01306             |

**Table S3.** Top lipid biomarkers for clinical classification of MCI and AD.

| MCI lipid biomarkers        |         |                  |          |
|-----------------------------|---------|------------------|----------|
| Lipids                      | AUC     | Fold-Change (FC) | P-value  |
| C20 H15 N2 O2               | 0.9825  | -0.97666         | 1.42E-15 |
| C26 H38 N3 O                | 0.96625 | -0.7128          | 6.69E-13 |
| C42 H85 N4 O3 Esi-23.58701  | 0.79125 | -0.99713         | 0.0001   |
| C42 H82 N2 O6 Esi-22.849985 | 0.75    | -0.26142         | 0.0022   |
| PI 18:0_22:6                | 0.7475  | -0.68393         | 0.0009   |
| C49 H80 O6                  | 0.74625 | -0.83277         | 0.0004   |
| C33 H58 N3 O2               | 0.74    | -0.42888         | 0.0141   |
| C45 H79 N3 O20              | 0.73375 | -0.36978         | 0.0031   |
| PI 16:0_22:6                | 0.73375 | -0.59816         | 0.0029   |
| AD lipid biomarkers         |         |                  |          |
| Lipids                      | AUC     | Fold-Change (FC) | P-value  |
| C5 H6 N3 O4                 | 0.87    | -0.72055         | 1.08E-07 |
| C22 H48 N3 O3 S2            | 0.7725  | 0.92553          | 0.0004   |
| C14 H41 N12 O8              | 0.77125 | 0.55078          | 0.0003   |
| LPC 18:2/0:0                | 0.76    | 0.57328          | 0.0004   |
| C19 H38 O2 Esi-11.682997    | 0.75125 | -0.32323         | 0.0004   |
| PI 16:0_22:6                | 0.74625 | 0.66571          | 0.0015   |
| PC 16:0_16:0                | 0.73875 | 0.44653          | 0.0016   |
| C17 H34 O2                  | 0.73125 | -0.23446         | 0.0101   |
| C42 H85 N4 O3 Esi-23.58701  | 0.73125 | 0.76489          | 0.0042   |
